# Supplementary material for: Equilibrium folding dynamics of meACP in water, heavy water, and low concentration of urea
Source: PubMed Central journal article supplement (PMC5700953; doi:10.1038/s41598-017-16449-4), 2017-11-23
Supplement: 41598_2017_16449_MOESM1_ESM.pdf [file 41598_2017_16449_MOESM1_ESM.pdf]

## **Supplementary Information**

Equilibrium folding dynamics of *meACP* in water, heavy water,  
and low concentration of urea

Yang Zhou and Daiwen. Yang\*

Department of Biological Sciences, National University of Singapore, 14  
Science Drive 4, 117543, Singapore

### *Discussion on H/D isotope effects*

The H/D isotope effects measured here on protein stability and folding rates have two origins: the replacement of amide H by D (amide isotope effect) and replacement of solvent (solvent isotope effect). The amide isotope effect is caused by the difference of H-bonding and D-bonding associated with backbone NH and CO moieties. This effect destabilizes  $\alpha$ -helical proteins but is negligible to  $\beta$ -sheet proteins<sup>1</sup>. The extent of destabilization to a protein is correlated with the number of helical hydrogen bonds in the protein. On the other hand, the solvent isotope effect has been shown to stabilize a protein<sup>2,3</sup>, which is independent of helical hydrogen bonding. As the D-bond of water is 0.1-0.2 kcal/mol more stable than the H-bond<sup>4</sup>, the deuterium water provides a more rigid and compacting environment for protein, enhancing the hydrophobic interactions noticeably through the solvent isotope effect. If the amide isotope effect contributes more significantly to the stability, we expect protein is less stable in D<sub>2</sub>O since *meACP* is a helical protein<sup>5</sup>. *meACP* was ~0.5 kcal/mol more stable in D<sub>2</sub>O (Tab. 1), showing the solvent isotope effect was more prominent.

According to Eq. 4 in the main text (see Materials and Methods section), the H/D solvent effects on  $k_f$  ( $k_{UN}$ ) and  $k_u$  ( $k_{NU}$ ) have two origins: energy barrier changes induced by co-solvents (changes of  $\Delta G^\ddagger$ ) and “viscosity-specific” effects ( $\eta$ ). As changing buffer condition from H<sub>2</sub>O to D<sub>2</sub>O,  $\eta$  increases from ~0.89 mPa·s to ~1.10 mPa·s at 25 °C and  $\Delta G_f^\ddagger$  is expected to be changed. The decrease (or increase) of  $\Delta G_f^\ddagger$  is expected to accelerate (or decelerate)  $k_f$ , and the increase of  $\eta$  is expected to slow down  $k_f$ . Obviously the decrease of  $\Delta G_f^\ddagger$  plays a dominating role as our results show a significantly accelerated folding (Tab.

1, Tabs S3 and S4). From the change of  $k_f$ , we can infer the change of  $\Delta G_f^\ddagger$  ( $\Delta\Delta G_{D2O-H2O}^{\ddagger,f} = \Delta G_{D2O}^{\ddagger,f} - \Delta G_{H2O}^{\ddagger,f}$ ):

$$\frac{k_f^{D2O}}{k_f^{H2O}} = \frac{C(\sigma + \eta_{D2O})^{-1} e^{-\Delta G_{D2O}^{\ddagger,f}/RT}}{C(\sigma + \eta_{H2O})^{-1} e^{-\Delta G_{H2O}^{\ddagger,f}/RT}} = \frac{(\sigma + \eta_{H2O})}{(\sigma + \eta_{D2O})} e^{-(\Delta G_{D2O}^{\ddagger,f} - \Delta G_{H2O}^{\ddagger,f})/RT}$$

$$< e^{-(\Delta G_{D2O}^{\ddagger,f} - \Delta G_{H2O}^{\ddagger,f})/RT} \quad [S1]$$

From Eq. S1, we have

$$\Delta G_{D2O}^{\ddagger,f} - \Delta G_{H2O}^{\ddagger,f} < -RT \ln \left( \frac{k_f^{D2O}}{k_f^{H2O}} \right) \approx -0.25 \text{ kcal/mol} \quad [S2]$$

According to Tab.1,  $\Delta G_f^{D2O} - \Delta G_f^{H2O} = -(\Delta G_{NU}^{D2O} - \Delta G_{NU}^{H2O}) = -0.5 \text{ kcal/mol}$ , and then

$$\frac{\Delta G_{D2O}^{\ddagger,f} - \Delta G_{H2O}^{\ddagger,f}}{\Delta G_f^{D2O} - \Delta G_f^{H2O}} > \frac{1}{2} \quad [S3]$$

The left part of Eq. S3 is defined as  $\phi_f$ , following the principle of the phi-value analysis, for substitution of solvent instead of amino acid<sup>6</sup>. Here  $\phi_f > \frac{1}{2}$ , was consistent with the results from urea effects ( $\phi_f \approx 1$ ), suggesting that the transition state ensemble is closer (more similar) to state N than to state U.

According to  $\phi_f \approx 1$ , which was derived from the urea effect, we assume  $\phi_f \approx 1$  (or  $\phi_u \approx 0$ ) for unfolding in D<sub>2</sub>O, i.e.,  $\phi_f$  is a solvent independent parameter. So, we

have  $\Delta G_{D_2O}^{\ddagger,u} \approx \Delta G_{H_2O}^{\ddagger,u}$ .

$$\frac{k_u^{D_2O}}{k_u^{H_2O}} = \frac{A(\sigma + \eta_{D_2O})^{-1} e^{-\Delta G_{D_2O}^{\ddagger,u}/RT}}{A(\sigma + \eta_{H_2O})^{-1} e^{-\Delta G_{H_2O}^{\ddagger,u}/RT}} \approx \frac{(\sigma + \eta_{H_2O})}{(\sigma + \eta_{D_2O})} e^{0/RT} = \frac{(\sigma + \eta_{H_2O})}{(\sigma + \eta_{D_2O})}. \quad [S4]$$

Eq. S4 demonstrates that the reduction of unfolding rates in D<sub>2</sub>O ( $k_u^{D_2O}$ ) might mainly come from the viscosity effect.

**Table S1.** Isotope effects on different proteins.

| Protein   | Amide isotope effect<br>( $\Delta G_{D_2O}^{ND} - \Delta G_{D_2O}^{NH}$ )<br>/kcal/mol | Solvent isotope effect<br>( $\Delta G_{D_2O}^{NH} - \Delta G_{H_2O}^{NH}$ )<br>/kcal/mol | Total<br>( $\Delta G_{D_2O}^{ND} - \Delta G_{H_2O}^{NH}$ )<br>/kcal/mol | References | PDB code | length | Volume |
|-----------|----------------------------------------------------------------------------------------|------------------------------------------------------------------------------------------|-------------------------------------------------------------------------|------------|----------|--------|--------|
| rat CD2   | ~0                                                                                     | -1.26                                                                                    | -1.26                                                                   | 2          | 1CDB     | 105    | 38598  |
| RNase A   | ---                                                                                    | ---                                                                                      | -0.7                                                                    | 7          | 2AAS     | 124    | 28064  |
| RNase T1  | ---                                                                                    | ---                                                                                      | -1.4                                                                    | 7          | 1BTA     | 89     | 14849  |
| NTL9      | 0.21(in H <sub>2</sub> O)<br>0.27(in D <sub>2</sub> O)                                 | -<br>0.67(NH)<br>0.61(ND)                                                                | -0.40 or -1.06 (two methods)                                            | 3,8        | 2HVF     | 52     | 8749   |
| GCN4 coil | ~0.4                                                                                   | ~-0.5                                                                                    | -0.1                                                                    | 6          | 1ZIK     | 66     | 11007  |
| LSZ       | ---                                                                                    | ---                                                                                      | -1.9                                                                    | 9          | 1E8L     | 129    | 32821  |
| BSA       | ---                                                                                    | ---                                                                                      | -3.5                                                                    | 9          | 4F5S     | 600    | 51372  |

Amide isotope effect refers to the replacement of amide hydrogen NH with ND. Positive values of ( $\Delta G_{D_2O}^{ND} - \Delta G_{D_2O}^{NH}$ ) indicate NH is more stable than ND. Solvent isotope effect ( $\Delta G_{D_2O}^{NH} - \Delta G_{H_2O}^{NH}$ ) refers to the change of solvent from H<sub>2</sub>O to D<sub>2</sub>O without changing the amide hydrogen, the negative values of ( $\Delta G_{D_2O}^{NH} - \Delta G_{H_2O}^{NH}$ ) shows proteins are more stable in D<sub>2</sub>O.

**Table S2.** Reduced  $\chi^2$  using different models.

| Model \ Data set                                            | <sup>15</sup> N (single labeled, in H <sub>2</sub> O) | <sup>15</sup> N (in 0.25 M Urea, H <sub>2</sub> O) | <sup>13</sup> Ca (single labeled, in D <sub>2</sub> O) | <sup>13</sup> Ca (single labeled, in H <sub>2</sub> O) | <sup>13</sup> Ca (single labeled, in 0.25 M urea) | <sup>13</sup> Ca (single labeled, in 0.50 M urea) |
|-------------------------------------------------------------|-------------------------------------------------------|----------------------------------------------------|--------------------------------------------------------|--------------------------------------------------------|---------------------------------------------------|---------------------------------------------------|
| $N \xrightleftharpoons{slow} U$                             | 2.311                                                 | 5.791                                              | 2.153                                                  | 1.942                                                  | 1.642                                             | 2.709                                             |
| $N \xrightleftharpoons{slow} U \xrightleftharpoons{slow} I$ | 1.074                                                 | 2.083                                              | 1.287                                                  | 1.821                                                  | 0.904                                             | 1.768                                             |
| $U \xrightleftharpoons{slow} N \xrightleftharpoons{slow} I$ | 1.127                                                 | 2.145                                              | 1.244                                                  | 1.902                                                  | 0.969                                             | 1.757                                             |
| The triangle model                                          | 0.991                                                 | 2.254                                              | 1.295                                                  | 1.777                                                  | 0.875                                             | 2.171                                             |
| $N \xrightleftharpoons{slow} I \xrightleftharpoons{slow} U$ | 5.315                                                 | 8.531                                              | 2.122                                                  | 3.837                                                  | 1.426                                             | 2.261                                             |

**Table S3.** Folding and unfolding parameters extracted with the triangle model.

| Solvent<br>s                               | Exp<br>t.        | $p_u$ (%) | $p_I$ (%) | $\Delta G_{NU}$<br>(kcal/mo<br>l) | $\Delta G_{NI}$<br>(kcal/<br>mol) | $k_{NU}$ ( $s^{-1}$ ) | $k_{UN}$<br>( $s^{-1}$ ) | $k_{UI}, k_{IU}$<br>( $s^{-1}$ ) | $k_{NI}, k_{IN}$<br>( $s^{-1}$ ) |
|--------------------------------------------|------------------|-----------|-----------|-----------------------------------|-----------------------------------|-----------------------|--------------------------|----------------------------------|----------------------------------|
| D <sub>2</sub> O                           | <sup>13</sup> Ca | 1.9±0.02  | ~2.5*     | 2.3                               | ~2.2*                             | 10.2 ±0.1             | 508±9                    | ~3, ~0.1*                        | ~0.5, ~21*                       |
| H <sub>2</sub> O                           | <sup>13</sup> Ca | 4.6±0.04  | ~1.9      | 1.8                               | ~2.3                              | 17.3 ±0.1             | 362±6                    | ~42, ~104                        | ~0.1, ~0.1                       |
| H <sub>2</sub> O                           | <sup>15</sup> N  | 4.7±0.03  | ~1.9      | 1.8                               | ~2.3                              | 15.3 ±0.1             | 308±5                    | ~1.5, ~0.1                       | ~0.4, ~23                        |
| <b>0.25 M<br/>Urea+<br/>H<sub>2</sub>O</b> | <sup>13</sup> Ca | 6.2±0.05  | ~1.6      | 1.6                               | ~2.4                              | 15.3 ±0.1             | 234±6                    | ~37, ~135                        | ~0.1, ~14                        |
| <b>0.25 M<br/>Urea+<br/>H<sub>2</sub>O</b> | <sup>15</sup> N  | 6.8±0.08  | ~3.3      | 1.5                               | ~2.0                              | 15.3 ±0.1             | 208±6                    | ~19, ~46                         | ~0.2, ~0.1                       |
| <b>0.50 M<br/>Urea+<br/>H<sub>2</sub>O</b> | <sup>13</sup> Ca | 7.6±0.42  | ~5.0      | 1.4                               | ~1.7                              | 15.3 ±0.4             | 174±8                    | ~22, ~13                         | ~0.1, ~20                        |

\*, “~” is used to indicate that the results were estimated as  $p_I$ ,  $k_{UI}$ ,  $k_{IU}$ ,  $k_{NI}$ , and  $k_{IN}$  are correlated in the fitting.

**Table S4.** Folding and unfolding parameters extracted with the three-state model U-N-I.

| Solvents                              | Expt.            | $p_u$ (%) | $p_I$<br>(%) | $\Delta G_{NU}$<br>(kcal/mol) | $\Delta G_{NI}$<br>(kcal/mol) | $k_{NU}$ ( $s^{-1}$ ) | $k_{UN}$ ( $s^{-1}$ ) | $k_{NI} + k_{IN}$<br>( $s^{-1}$ ) |
|---------------------------------------|------------------|-----------|--------------|-------------------------------|-------------------------------|-----------------------|-----------------------|-----------------------------------|
| D <sub>2</sub> O                      | <sup>13</sup> Ca | 2.0±0.01  | ~2.4*        | 2.3                           | ~2.2*                         | 10.4±1.7              | 494.3±9.1             | ~23*                              |
| H <sub>2</sub> O                      | <sup>13</sup> Ca | 4.4±0.02  | ~2.4         | 1.8                           | ~2.2                          | 16.8±0.9              | 366.9±10.6            | ~47                               |
| H <sub>2</sub> O                      | <sup>15</sup> N  | 4.7±0.01  | ~5.3         | 1.8                           | ~1.7                          | 15.6±0.3              | 302.4±4.3             | ~3                                |
| <b>0.25 M<br/>Urea+H<sub>2</sub>O</b> | <sup>13</sup> Ca | 6.4±0.05  | ~2.4         | 1.6                           | ~2.2                          | 15.6±0.7              | 231.3±8.5             | ~35                               |
| <b>0.25 M<br/>Urea+H<sub>2</sub>O</b> | <sup>15</sup> N  | 6.5±0.06  | ~7.8         | 1.5                           | ~1.4                          | 15.2±0.3              | 202.4±2.9             | ~13                               |
| <b>0.50 M<br/>Urea+H<sub>2</sub>O</b> | <sup>13</sup> Ca | 7.9±0.04  | ~13.3        | 1.4                           | ~1.1                          | 16.1±0.8              | 170.1±3.9             | ~14                               |

\*, “~” is used to indicate that the results were estimated as  $p_I$  and  $(k_{UI} + k_{IU})$  are correlated in the fitting.

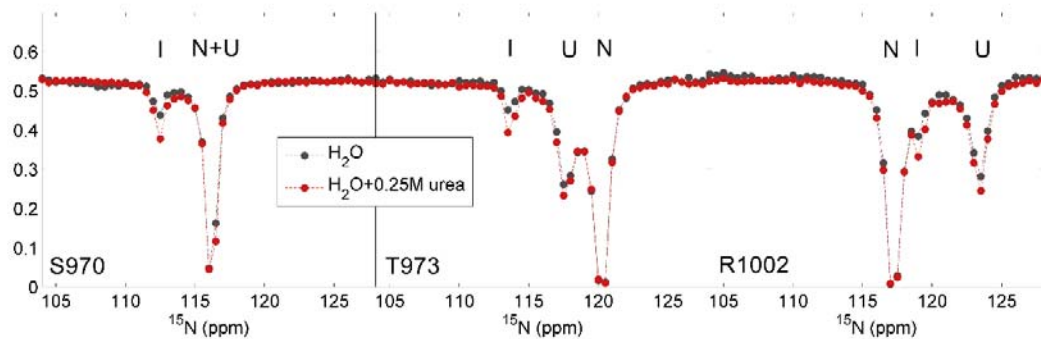

**Figure S1.** Comparison of  $^{15}\text{N}$  CEST profiles in  $\text{H}_2\text{O}$  and 0.25 M urea.

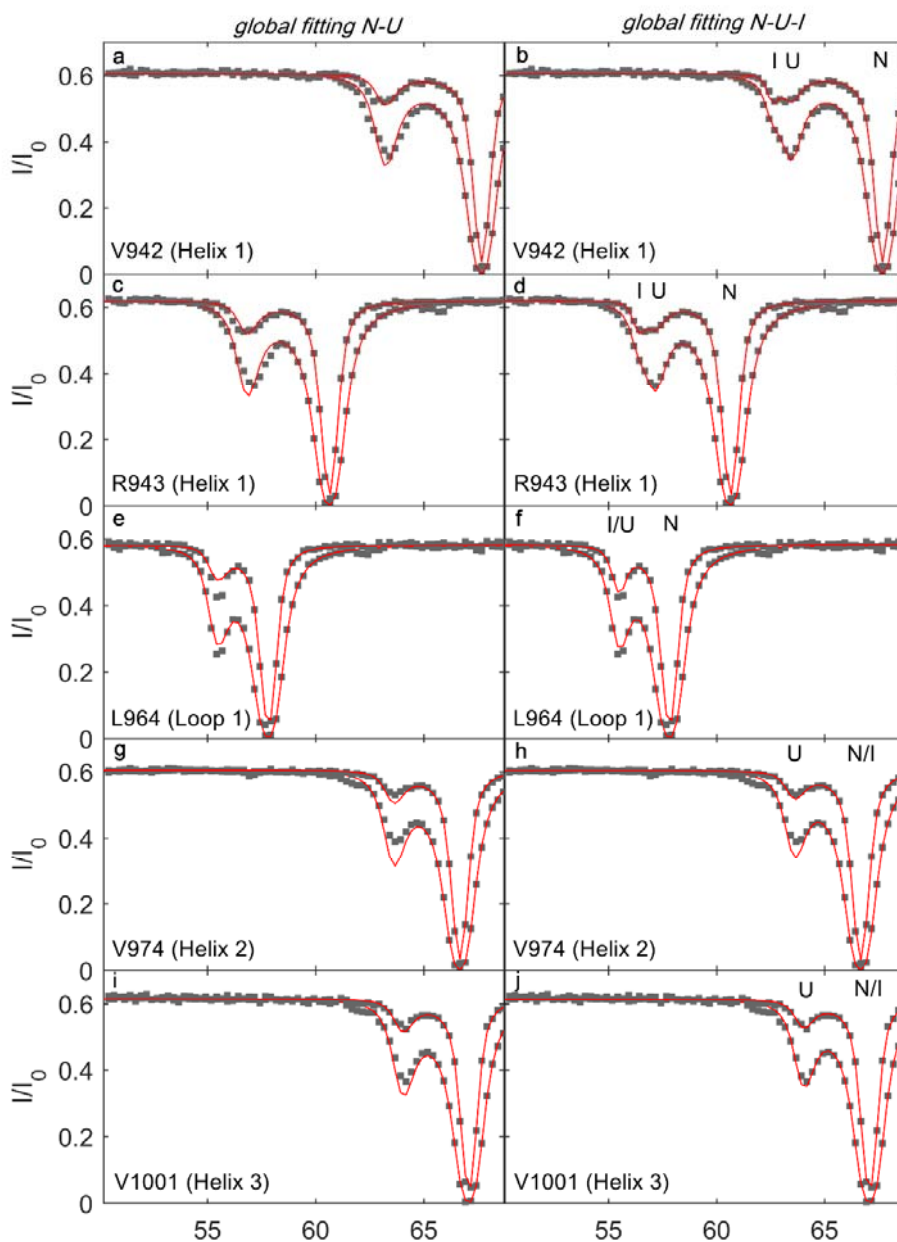

**Figure S2.** Examples of  $D_2O$   $^{13}Ca$  CEST *global fitting* using the two-state model N-U (left: *a, c, e, g, i*) and three-state model N-U-I (right: *b, d, f, h, j*). Grey squares are experimental data, red lines are calculated profiles based on *global fitting* using the two-state model (or three-state model), where all residues share same  $k_{ex}$  and  $p_u$  (and  $p_l$ ). The fitting based on the two-state model was bad, especially for the minor dip regions. By comparing profiles of residues in C- and N-terminal regions, we can see obvious differences in the depth of the minor state, which indicate the differences of  $p_u$  for the two regions.



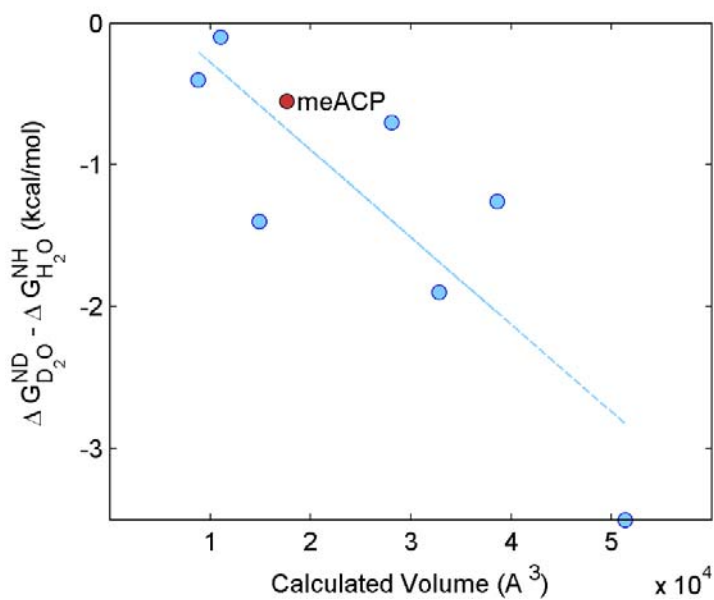

**Figures S3.** Correlation of H/D solvent isotope effect with protein size.

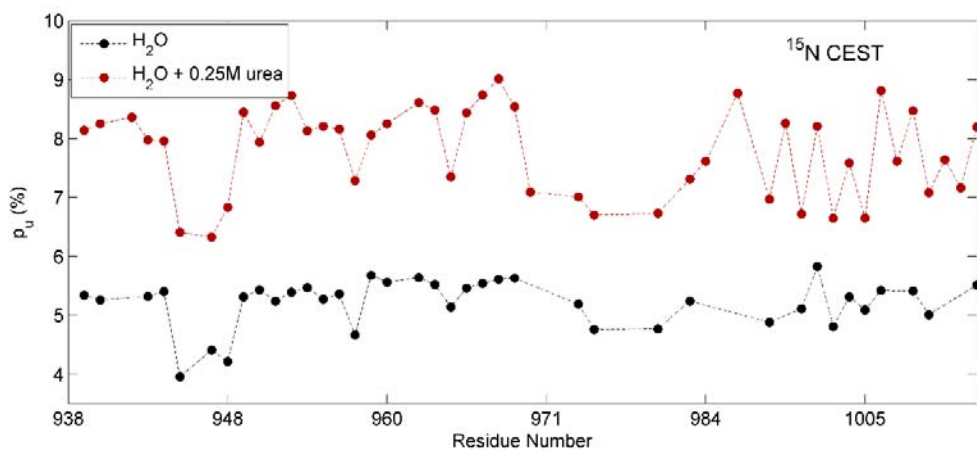

**Figure S4.** Populations of state U ( $p_u$ ) extracted from individual  $^{15}\text{N}$  CEST profiles recorded in  $\text{H}_2\text{O}$  and 0.25 M urea. The two-state model (M1) was used in the extraction of  $p_u$ .

## References

- 1 Krantz, B. A. *et al.* Understanding protein hydrogen bond formation with kinetic H/D amide isotope effects. *Nat. Struct. Mol. Biol.* **9**, 458-463 (2002).
- 2 Parker, M. J. & Clarke, A. R. Amide backbone and water-related H/D isotope effects on the dynamics of a protein folding reaction. *Biochemistry* **36**, 5786-5794 (1997).
- 3 Kuhlman, B. & Raleigh, D. P. Global analysis of the thermal and chemical denaturation of the N - terminal domain of the ribosomal protein L9 in H<sub>2</sub>O and D<sub>2</sub>O. Determination of the thermodynamic parameters,  $\Delta H^\circ$ ,  $\Delta S^\circ$ , and  $\Delta C^\circ_p$ , and evaluation of solvent isotope effects. *Protein Sci.* **7**, 2405-2412 (1998).
- 4 Scheiner, S. & Cuma, M. Relative stability of hydrogen and deuterium bonds. *J. Am. Chem. Soc.* **118**, 1511-1521 (1996).
- 5 Lim, J. *et al.* Solution Structures of the Acyl Carrier Protein Domain from the Highly Reducing Type I Iterative Polyketide Synthase CalE8. *Plos One* **6**, e20549 (2011).
- 6 Krantz, B. A., Moran, L. B., Kentsis, A. & Sosnick, T. R. D/H amide kinetic isotope effects reveal when hydrogen bonds form during protein folding. *Nat. Struct. Mol. Biol.* **7**, 62-71 (2000).
- 7 Huyghues-Despointes, B. M., Scholtz, J. M. & Pace, C. N. Protein conformational stabilities can be determined from hydrogen exchange rates. *Nat. Struct. Mol. Biol.* **6**, 910-912 (1999).
- 8 Sato, S. & Raleigh, D. P. Kinetic isotope effects reveal the presence of significant secondary structure in the transition state for the folding of the N-terminal domain of L9. *J. Mol. Biol.* **370**, 349-355 (2007).
- 9 Efimova, Y., Haemers, S., Wierczinski, B., Norde, W. & Van Well, A. Stability of globular proteins in H<sub>2</sub>O and D<sub>2</sub>O. *Biopolymers* **85**, 264-273 (2007).
